# Supplementary material for: A general and eco-friendly self-etching route to prepare highly active and stable Au@metal silicate yolk-shell nanoreactors for catalytic reduction of 4-nitrophenol
Source: Royal Society of Chemistry journal article supplement (doi:10.1039/c3ce40350e), 2013-01-01
Supplement: c3ce40350e.pdf [file c3ce40350e.pdf]

## Electronic Supplementary Information

# A general and eco-friendly self-etching route to prepare highly active and stable Au@metal silicate yolk-shell nanoreactors for catalytic reduction of 4-nitrophenol

Kai Dong,<sup>ab</sup> Zhen Liu,<sup>ab</sup> Jinsong Ren\*<sup>a</sup>

<sup>a</sup> D. Kai, Z. Liu, X. Yang, Prof. Dr. J. Ren

Laboratory of Chemical Biology and State Key laboratory of Rare Earth Resources Utilization,  
Changchun Institute of Applied Chemistry, Chinese Academy of Sciences Changchun, 130022  
(PR China)

<sup>b</sup> University of the Chinese Academy of Sciences, Beijing, 100039 (PR China)

Fax: (+86) 0431-85262625

E-mail: jren@ciac.jl.cn

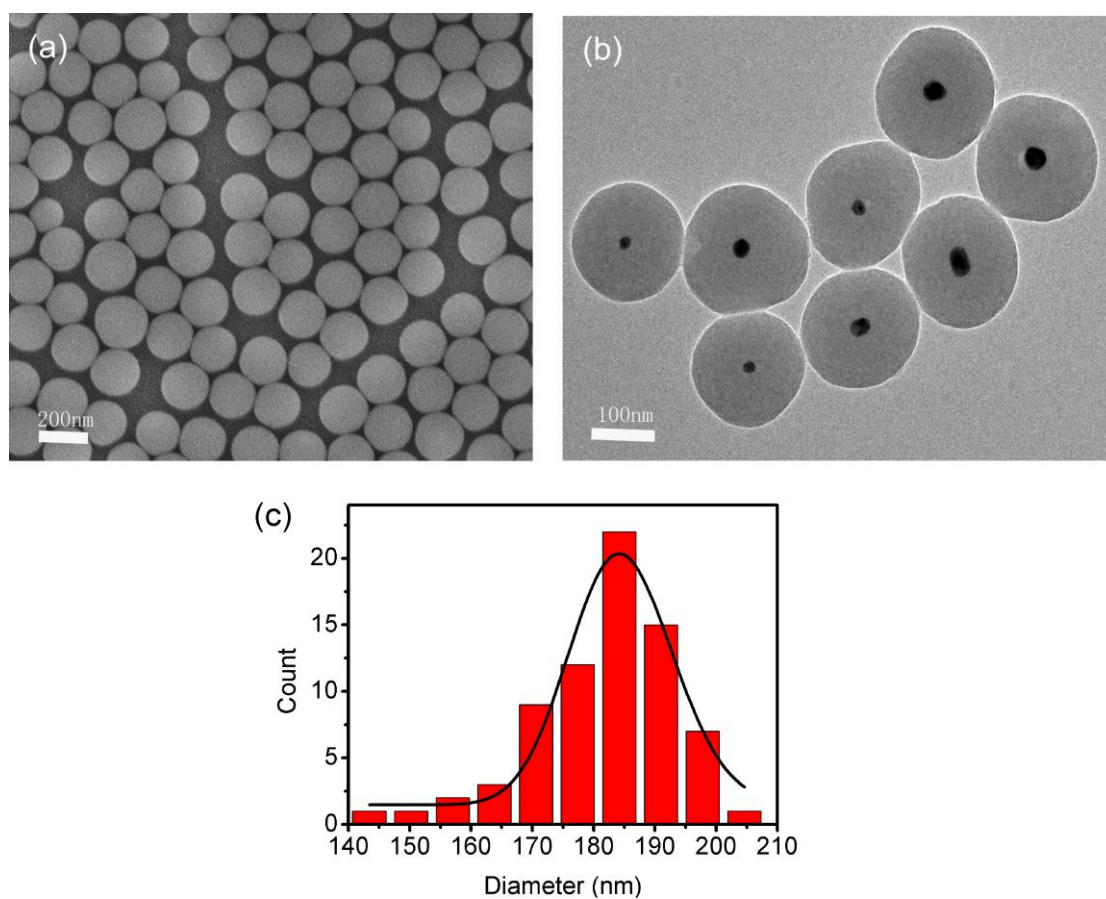

**Figure S1** (a) SEM, (b) TEM image, and (c) size distribution analysis of the precursor Au@SiO<sub>2</sub> core-shell particles.

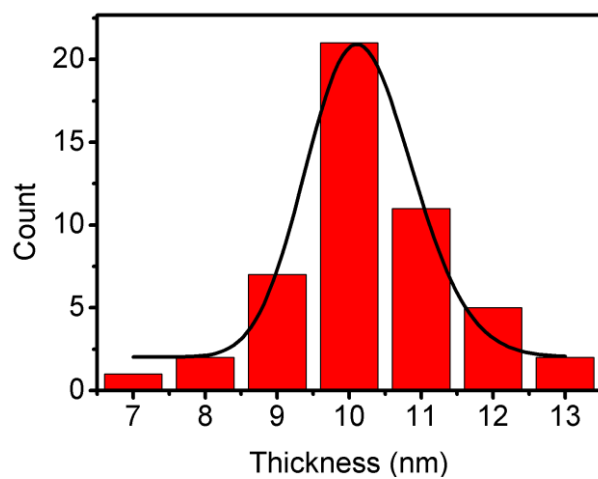

**Figure S2** The average thickness of the Au@MgSiO<sub>3</sub> nanoshell.

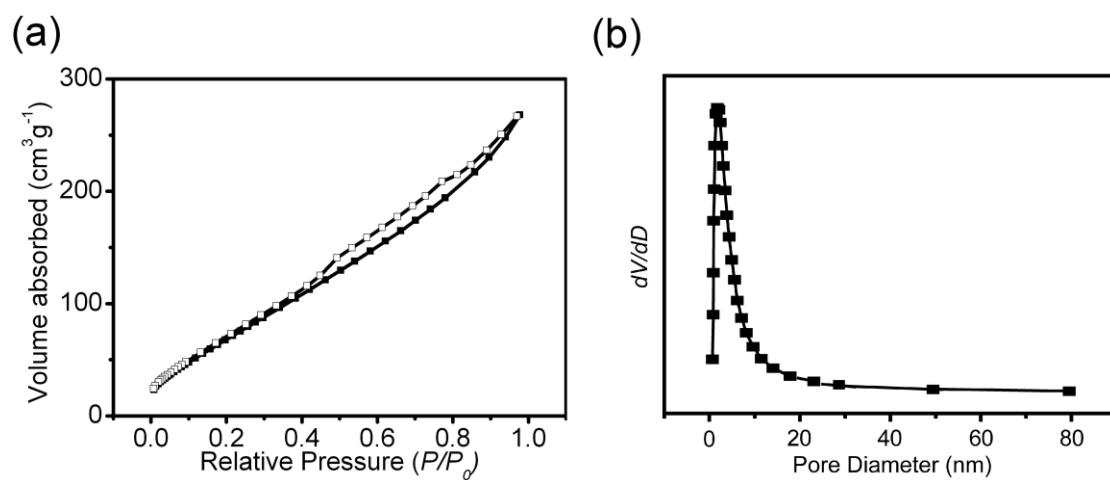

**Figure S3** (a) Nitrogen adsorption-desorption isotherm of Au@MgSiO<sub>3</sub> and (b) BJH pore-size distribution plot of Au@MgSiO<sub>3</sub> obtained from the adsorption data.

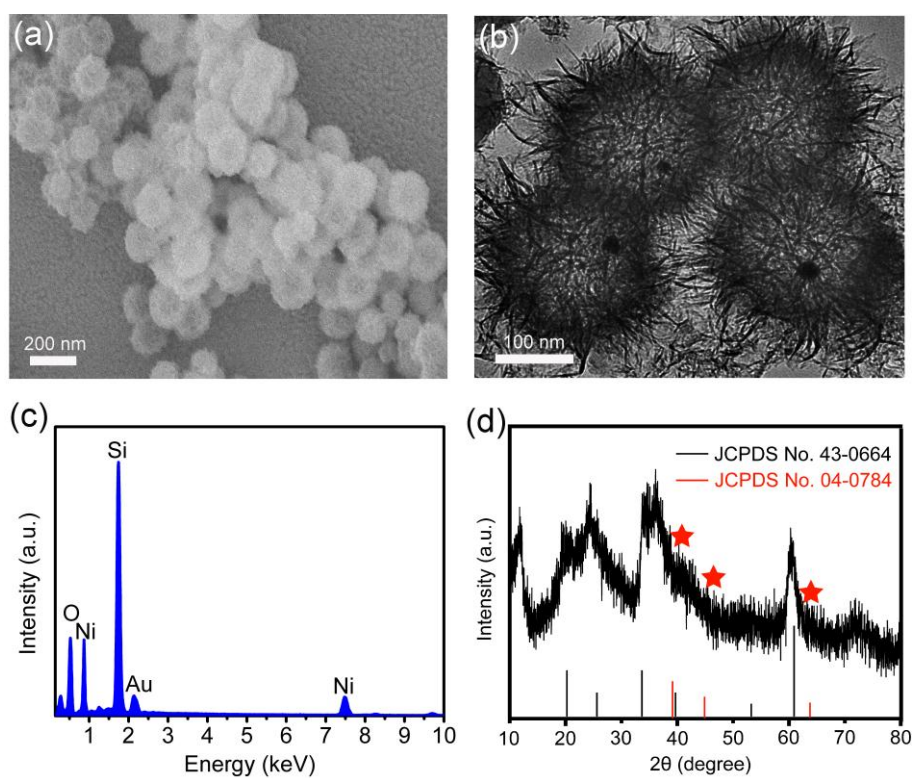

**Figure S4** (a) SEM image of the yolk-shell Au@NiSiO<sub>3</sub>; (b) TEM image of the yolk-shell Au@NiSiO<sub>3</sub>; (c) EDS and (d) XRD pattern of the yolk-shell Au@NiSiO<sub>3</sub> (the star represent the typical diffraction peaks of cubic gold).

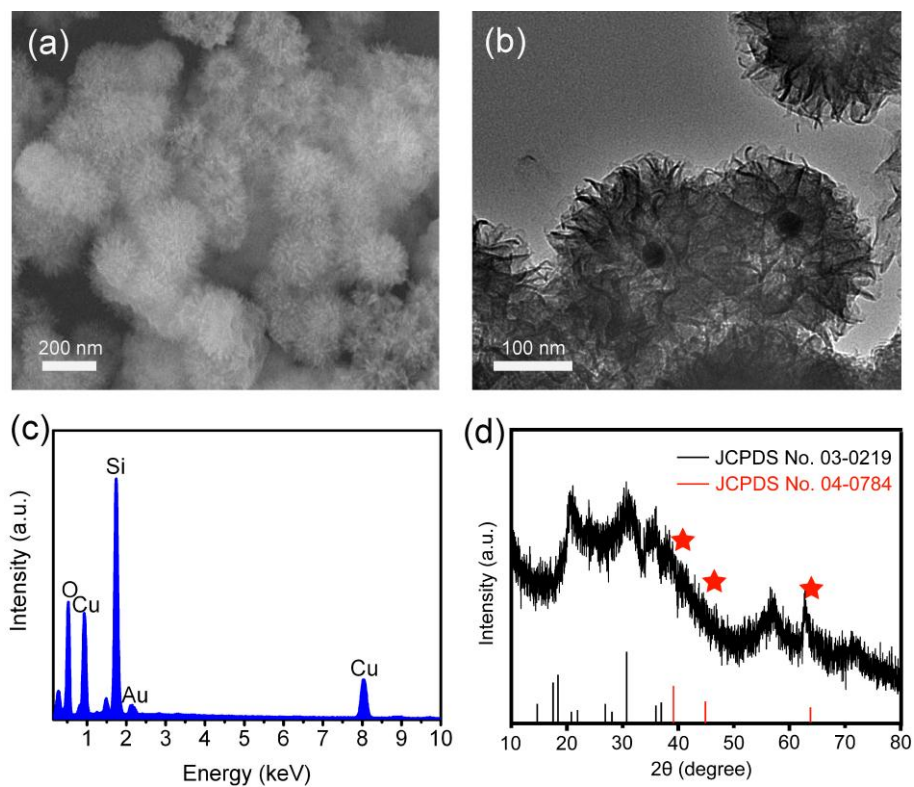

**Figure S5** (a) SEM image of the yolk-shell Au@CuSiO<sub>3</sub>; (b) TEM image of the yolk-shell Au@CuSiO<sub>3</sub>; (c) EDS and (d) XRD pattern of the yolk-shell Au@CuSiO<sub>3</sub> (the star represent the typical diffraction peaks of cubic gold).

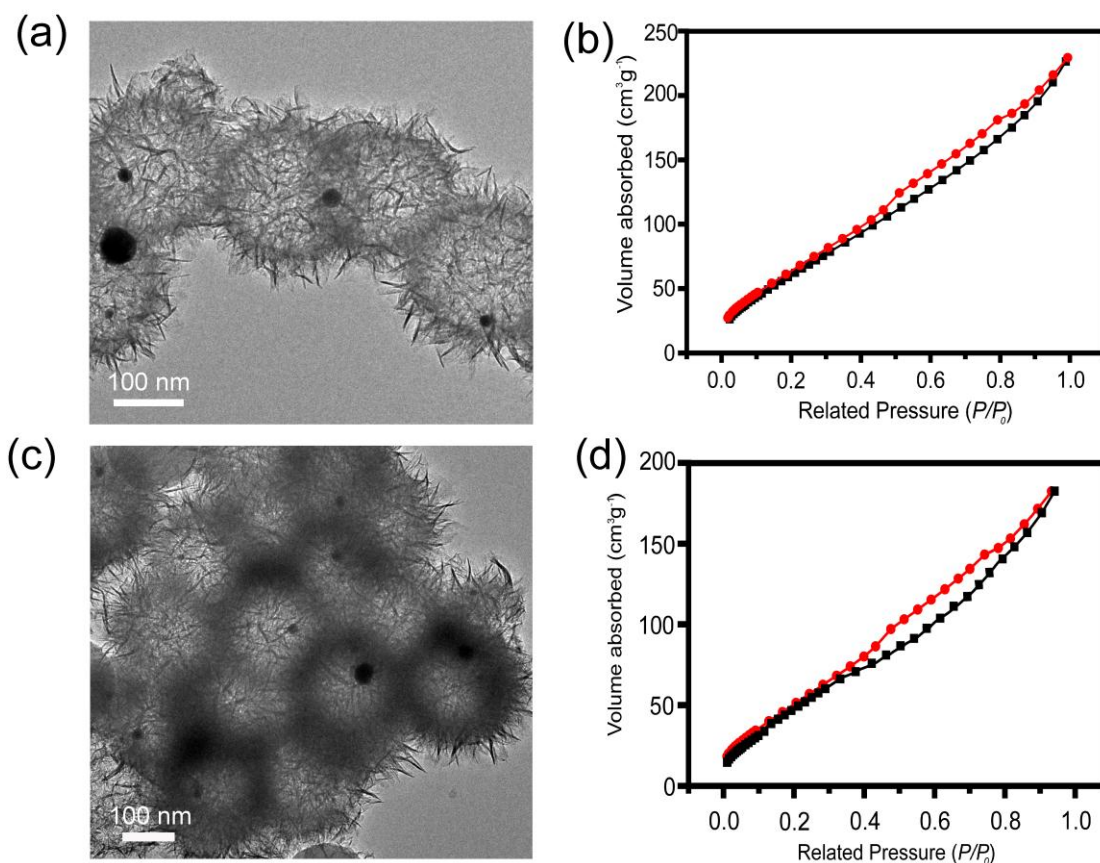

**Figure S6** (a) TEM image and (b) nitrogen adsorption-desorption isotherm of the yolk-shell Au@MgSiO<sub>3</sub> after calcination at 200 °C for 2 h; (c) TEM image and (d) nitrogen adsorption-desorption isotherm of the yolk-shell Au@MgSiO<sub>3</sub> after calcination at 500 °C for 2 h.
